# Supplementary material for: Self-Powered Gradient Hydrogel Sensor with the Temperature-Triggered Reversible Adhension
Source: MDPI journal article supplement (doi:10.3390/polym14235312), 2022-12-05
Supplement: s1 [file s1]

## Supporting Information

# Self-powered gradient hydrogel sensor with the temperature-triggered reversible adhesion

Dong Sun<sup>1</sup>, Cun Peng<sup>2</sup>, Yuan Tang<sup>1</sup>, Pengfei Qi<sup>1</sup>, Wenxin Fan<sup>1</sup>, Qiang Xu<sup>3,\*</sup> and Kunyan Sui<sup>1\*</sup>

<sup>1</sup> State Key Laboratory of Bio-Fiber and Eco-Textiles, Collaborative Innovation Center for Marine Biobased Fibers and Ecological Textile Technology Institute of Marine Biobased Materials, College of Materials Science and Engineering, Qingdao University, Qingdao 266071, China

<sup>2</sup> College of Chemistry and Bioengineering, Hunan University of Science and Engineering, Yongzhou 425199, China

<sup>3</sup> Department of Ophthalmology, The Affiliated Hospital of Qingdao University, Qingdao 266071, China

\* Correspondence: yanxexuqiang@126.com (Q.X.); sky@qdu.edu.cn (K.S.)

### Supplemental Figures

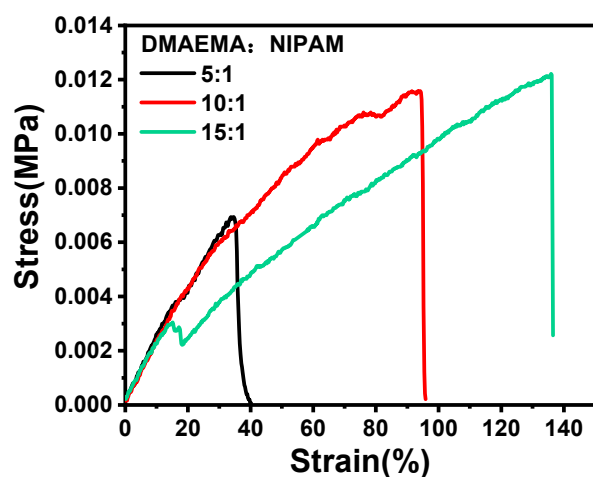

Figure S1. Stress-strain curves of the hydrogel with different DMAEMA/NIPAM mass ratios after 6 hours of UV irradiation.

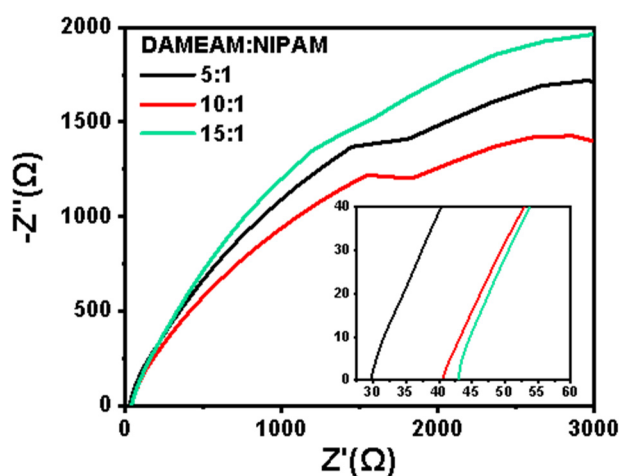

Figure S2. EIS Nyquist diagram of hydrogels membranes with different DMAEMA: NIPAM mass ratios.

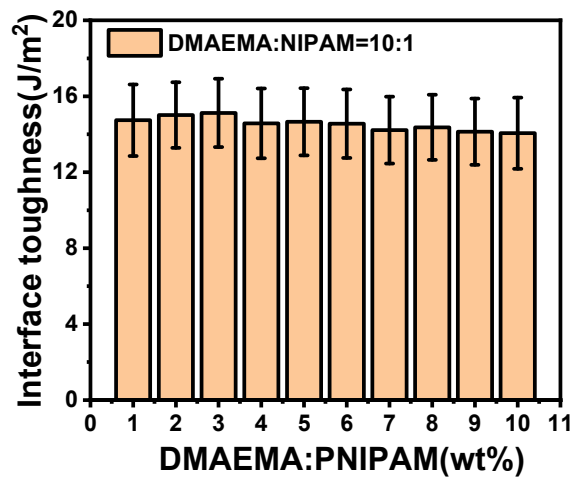

**Figure S3.** DMAEMA: NIPAM=10:1 interface toughness of the hydrogel after repeated adhesion of silicone rubber for 10 times.

**Table S1.** Summary of various self-powered sensors.

|                       | Materials                  | Advantages                                              | Disadvantages                  | Sensitivity  |
|-----------------------|----------------------------|---------------------------------------------------------|--------------------------------|--------------|
| Piezoelectric sensors | PS/PDMS <sup>[1]</sup>     | Suitable for micro-systems                              | Interface incompatibility      | 59.4mV/kPa   |
|                       | PZT/PVDF <sup>[2]</sup>    | High output voltage                                     | Poor stability                 | 6.38mV/N     |
|                       | ZnO <sup>[3]</sup>         | Self-power ability                                      | Static sensing                 | 0.62V/kPa    |
|                       | P(VDF-TrFE) <sup>[4]</sup> | High power density                                      | Electronic signal transmission | 1.4V/kPa     |
| TENG                  | AC/PU <sup>[5]</sup>       | Miniaturization and lightness                           | Environment interferences      | 0.94V/kPa    |
|                       | PTFE <sup>[6]</sup>        | High conversion efficiency<br>Ion signal transmission   | Limited durability             | —            |
| Our work              | PDMAEMA/PNIPMA             | Accurately sense static pressure<br>Reversible adhesion |                                | 106.46mV/MPa |

## References

1. M. Mariello, L. Fachechi, F. Guido, M. D. Vittorio, Conformal, Ultra-thin Skin-Contact-Actuated Hybrid Piezo/Triboelectric Wearable Sensor Based on AlN and ParyleneEncapsulated Elastomeric Blend, *Advanced Function Materials*. 31 (2021) 2101047.
2. G. Tiana , W. Denga, Y. Gaoa, D. Xionga, C. Yana, X. Hea, T. Yanga, L. Jina, X. Chua, H. Zhanga, W. Yanb, W. Yang, Rich lamellar crystal baklava-structured PZT/PVDF piezoelectric sensor toward individual table tennis training, *Nano Energy*. 59 (2019) 574-581.
3. Y. Tan, K. Yang, B. Wang, H. Li, L. Wang, C. Wang, High-performance textile piezoelectric pressure sensor with novel structural hierarchy based on ZnO nanorods array for wearable application, *Nano Research*. 14 (2021) 3969-3976.
4. Y. Shin, S. Sohn, H. Han, Y. Park, H. Shin, H. Ko, Self-powered triboelectric/pyroelectric multimodal sensors with enhanced performances and decoupled multiple stimuli, *Nano Energy*. 72 (2020) 104671.
5. P. Yang, Y. Shi, S. Li, X. Tao, Z. Liu, X. Wang, Z. Wang, X. Chen, Monitoring the degree of comfort of shoes in-motion using triboelectric pressure sensors with an ultrawide detection range, *ACS Nano*. 16 (2022) 4654-4665.
6. D. Wang, D. Zhang, Y. Yang, Q. Mi, J. Zhang, L. Yu, Multifunctional latex/ polytetrafluoroethylene-based triboelectric nanogenerator for self-powered organ-like MXene/metal-organic framework-derived CuO nanohybrid ammonia sensor, *ACS Nano*. 15 (2021) 2911-2919.
